# Supplementary material for: Chaste: An Open Source C++ Library for Computational Physiology and Biology
Source: PLOS journal article supplement (doi:10.1371/journal.pcbi.1002970), 2013-03-14
Supplement: S2 (10.1371/journal.pcbi.1002970.s002) [file journal.pcbi.1002970.s002]

301 Moved Permanently

# Moved Permanently

The document has moved here.

---

Apache Server at www.ploscompbiol.org Port 80
